# Supplementary material for: Anti-glycation and anti-inflammatory activities of anthocyanins from purple vegetables
Source: Royal Society of Chemistry journal article supplement (doi:10.1039/d2fo03645b), 2023-01-01
Supplement: d2fo03645b1.pdf [file d2fo03645b1.pdf]

## Supplementary data

Table S1. Profile of total anthocyanins and individual anthocyanins in purple vegetables.

Table S2. The trapping activity of MGO by anthocyanins from PCA, PSP, PCO and GB.

Table S3. The inhibiting rate on A $\beta$ <sub>1-42</sub> fibrillation by anthocyanins from PCA, PSP, PCO and GB.

Table S4. Effect of anthocyanins from PCA, PSP, PCO and GB on BV2 cells viability.

Table S5. Effect of anthocyanins from PCA, PSP, PCO and GB on NO and TNF- $\alpha$  production in LPS-stimulated BV2 cells.

Table S6. Effect of anthocyanins from PCA, PSP, PCO and GB on LPS-induced activation of TLR4 and MyD88 in BV2 cells.

Fig. S1. Electrophoretic gels and blots of anthocyanins from PCA, PSP, PCO and GB on LPS-induced activation of TLR4 (A) and MyD88 (B) in BV2 cells.

Table S1. Profile of total anthocyanins and individual anthocyanins in purple vegetables.

| Vegetables                         | Total anthocyanins<br>(mg Cy3G · 100 g <sup>-1</sup> ) | Peak no. | t (min) | [M] <sup>+</sup><br>( <i>m/z</i> ) | Fragments ( <i>m/z</i> ) | Anthocyanin                                                     | Relative<br>content (%) |
|------------------------------------|--------------------------------------------------------|----------|---------|------------------------------------|--------------------------|-----------------------------------------------------------------|-------------------------|
| Purple<br>cabbage<br>(PCA)         | 98.01±1.12a                                            | 1        | 7.692   | 465                                | 303                      | Delphinidin-3-glucoside                                         | 15.08                   |
|                                    |                                                        | 2        | 13.193  | 525                                | 301                      | Sinapylpeonidin                                                 | 5.29                    |
|                                    |                                                        | 3        | 13.921  | 773                                | 449, 287                 | Cyanidin-3-sophoroside-5-glucoside                              | 16.67                   |
|                                    |                                                        | 4        | 15.903  | 1141                               | 979, 817, 449, 287       | Cyanidin-3-(sinapyl)-triglucoside-5-glucoside                   | 1.32                    |
|                                    |                                                        | 5        | 16.550  | 979                                | 817, 449, 287            | Cyanidin-3-(sinapyl)-diglucoside-5-glucoside                    | 6.24                    |
|                                    |                                                        | 6        | 16.679  | 1081                               | 919, 754, 449, 287       | Cyanidin-3-(caffeoyl)(p-coumaroyl)-diglucoside-5-glucoside      | 3.89                    |
|                                    |                                                        | 7        | 18.702  | 1287                               | 1125, 979, 449, 287      | Cyanidin-3-(ferulyl)(ferulyl)-triglucoside-5-glucoside          | 0.73                    |
|                                    |                                                        | 8        | 23.733  | 919                                | 757, 449, 287            | Cyanidin-3-(p-coumaroyl)-diglucoside-5-glucoside                | 28.76                   |
|                                    |                                                        | 9        | 26.055  | 519                                | 271                      | Pelargonidin-3-(malonyl)-glucoside                              | 17.35                   |
|                                    |                                                        | 10       | 28.457  | 1287                               | 1125, 979, 449, 287      | Cyanidin-3-(ferulyl)(ferulyl)-triglucoside-5-glucoside          | 0.34                    |
|                                    |                                                        | 11       | 29.428  | 1125                               | 979, 449, 287            | Cyanidin-3-(sinapyl)(p-coumaroyl)-diglucoside-5-glucoside       | 2.99                    |
|                                    |                                                        | 12       | 30.487  | 1155                               | 993, 449, 287            | Cyanidin-3-(sinapyl)(ferulyl)-diglucoside-5-glucoside           | 0.53                    |
|                                    |                                                        | 13       | 30.949  | 1185                               | 817, 449, 287            | Cyanidin-3-(sinapyl)(sinapyl)-diglucoside-5-glucoside           | 0.81                    |
| Purple<br>sweet<br>potato<br>(PSP) | 8.06±1.17c                                             | 1        | 8.291   | 465                                | 303                      | Delphinidin-3-glucoside                                         | 13.72                   |
|                                    |                                                        | 2        | 13.201  | 525                                | 301                      | Sinapylpeonidin                                                 | 13.89                   |
|                                    |                                                        | 3        | 14.002  | 773                                | 449, 287                 | Cyanidin-3-sophoroside-5-glucoside                              | 1.65                    |
|                                    |                                                        | 4        | 17.618  | 907                                | 745, 463, 301            | Peonidin-3-hydroxybenzoylsophoroside-5-glucoside                | 14.36                   |
|                                    |                                                        | 5        | 18.354  | 433                                | 271                      | Pelargonidin-3-glucoside                                        | 12.03                   |
|                                    |                                                        | 6        | 19.616  | 963                                | 801, 479, 317            | Petunidin-3-(ferulyl)-rutinoside-5-glucoside                    | 4.10                    |
|                                    |                                                        | 7        | 22.204  | 949                                | 787, 449, 287            | Cyanidin-3-(ferulyl)-diglucoside-5-glucoside                    | 9.97                    |
|                                    |                                                        | 8        | 23.636  | 1111                               | 949, 787, 449, 287       | Cyanidin-3-(caffeoyl)(ferulyl)-diglucoside-5-glucoside          | 2.21                    |
|                                    |                                                        | 9        | 25.949  | 1069                               | 907, 463, 301            | Peonidin-3-(6-caffeoyl-6-hydroxybenzoylsophoroside)-5-glucoside | 18.54                   |
|                                    |                                                        | 10       | 26.079  | 519                                | 271                      | Pelargonidin-3-(malonyl)-glucoside                              | 3.08                    |

|                      |             |                           |            |      |               |                                                           |       |
|----------------------|-------------|---------------------------|------------|------|---------------|-----------------------------------------------------------|-------|
| Purple corn<br>(PCO) | 27.55±0.59b | 11                        | 27.600     | 1125 | 979, 449, 287 | Cyanidin-3-(sinapyl)(p-coumaroyl)-diglucoside-5-glucoside | 6.45  |
|                      |             | 1                         | 12.841     | 525  | 301           | Sinapylpeonidin                                           | 6.21  |
|                      |             | 2                         | 16.680     | 449  | 287           | Cyanidin-3-glucoside                                      | 13.03 |
|                      |             | 3                         | 18.211     | 463  | 301           | Peonidin-3-glucoside                                      | 6.13  |
|                      |             | 4                         | 19.449     | 535  | 287           | Cyanidin-3-(malonyl)-glucoside                            | 8.65  |
|                      |             | 5                         | 23.063     | 549  | 301           | Peonidin-3-(malonyl)-glucoside                            | 10.32 |
|                      |             | 6                         | 25.222     | 635  | 287           | Cyanidin-3-(malonyl)(succinyl)-glucoside                  | 28.45 |
|                      |             | 7                         | 26.133     | 517  | 355           | Pyranomalvinidin-3-glucoside                              | 16.14 |
|                      |             | 8                         | 27.246     | 563  | 301           | Peonidin-3-(succinyl)-glucoside                           | 6.91  |
|                      |             | 9                         | 42.455     | 903  | 741, 433, 271 | Pelargonidin-3-(p-coumaroyl)-diglucoside-5-glucoside      | 4.16  |
|                      |             | Gynura<br>bicolor<br>(GB) | 3.17±1.70d | 1    | 7.021         | 287                                                       | 287   |
| 2                    | 7.733       |                           |            | 465  | 303           | Delphinidin-3-glucoside                                   | 2.67  |
| 3                    | 9.642       |                           |            | 463  | 301           | Peonidin-3-glucoside                                      | 19.97 |
| 4                    | 13.080      |                           |            | 525  | 301           | Sinapylpeonidin                                           | 12.49 |
| 5                    | 17.569      |                           |            | 303  | 303           | Delphinidin                                               | 2.81  |
| 6                    | 20.708      |                           |            | 525  | 301           | Sinapylpeonidin                                           | 1.84  |
| 7                    | 25.966      |                           |            | 519  | 271           | Pelargonidin-3-(malonyl)-glucoside                        | 6.17  |
| 8                    | 33.254      |                           |            | 449  | 287           | Cyanidin-3-glucoside                                      | 51.96 |

Different letters in each column mean significant differences ( $p < 0.05$ )

Table S2. The trapping activity of MGO by anthocyanins from PCA, PSP, PCO and GB.

| Concentration level<br>( $\mu\text{g/mL}$ ) | MGO trapping activity (%) |                    |                    |                    |                    |
|---------------------------------------------|---------------------------|--------------------|--------------------|--------------------|--------------------|
|                                             | AG                        | PCA                | PSP                | PCO                | GB                 |
| 50                                          | 18.17 $\pm$ 1.78aA        | 28.59 $\pm$ 1.23bA | 28.97 $\pm$ 1.34bA | 28.94 $\pm$ 0.96bA | 28.7 $\pm$ 0.98bA  |
| 100                                         | 36.13 $\pm$ 1.56aB        | 39.57 $\pm$ 1.67aB | 39.58 $\pm$ 1.21aB | 39.53 $\pm$ 1.03aB | 40.02 $\pm$ 1.58aB |
| 200                                         | 63.04 $\pm$ 2.01aC        | 60.12 $\pm$ 1.87aC | 60.86 $\pm$ 0.97aC | 60.11 $\pm$ 1.53aC | 60.97 $\pm$ 1.79aC |

Lowercase letters represent the significant difference between different treatment groups under the same concentration, and capital letters represent the significant difference between different concentrations under the same treatment group ( $p < 0.05$ ).

Table S3. The inhibiting rate on  $\text{A}\beta_{1-42}$  fibrillation by anthocyanins from PCA, PSP, PCO and GB.

| Induction styles  | Inhibitory rate (%) |                   |                   |                    |                   |                   |
|-------------------|---------------------|-------------------|-------------------|--------------------|-------------------|-------------------|
|                   | AG                  | RES               | PCA               | PSP                | PCO               | GB                |
| Thermal induction | 38.83 $\pm$ 6.88c   | 73.83 $\pm$ 0.66a | 42.31 $\pm$ 1.75c | 40.75 $\pm$ 7.84c  | 56.93 $\pm$ 2.28b | 43.96 $\pm$ 4.71c |
| MGO induction     | 59.73 $\pm$ 3.15b   | 74.94 $\pm$ 0.79a | 55.27 $\pm$ 0.94b | 53.15 $\pm$ 0.35bc | 55.85 $\pm$ 0.61b | 47.72 $\pm$ 0.63c |

Letters represent the significant difference between different treatment groups at the same induction treatment ( $p < 0.05$ ).

Table S4. Effect of anthocyanins from PCA, PSP, PCO and GB on BV2 cells viability.

| Concentration of<br>anthocyanins<br>( $\mu\text{g/mL}$ ) | Cell viability (%) |                   |                   |                    |
|----------------------------------------------------------|--------------------|-------------------|-------------------|--------------------|
|                                                          | PCA                | PSP               | PCO               | GB                 |
| Blank control                                            | 99.92 $\pm$ 2.14a  |                   |                   |                    |
| 10                                                       | 98.81 $\pm$ 3.77a  | 99.95 $\pm$ 0.81a | 98.30 $\pm$ 1.35a | 98.03 $\pm$ 1.01a  |
| 20                                                       | 95.90 $\pm$ 4.68a  | 99.66 $\pm$ 0.74a | 93.07 $\pm$ 3.02a | 100.35 $\pm$ 3.25a |
| 50                                                       | 94.16 $\pm$ 4.01a  | 93.25 $\pm$ 4.63a | 93.12 $\pm$ 3.26a | 96.72 $\pm$ 2.68a  |
| 100                                                      | 91.85 $\pm$ 7.18a  | 92.56 $\pm$ 1.99a | 92.89 $\pm$ 3.65a | 95.72 $\pm$ 3.61a  |
| 200                                                      | 89.34 $\pm$ 6.57a  | 91.53 $\pm$ 2.00a | 91.98 $\pm$ 4.87a | 89.52 $\pm$ 6.23a  |
| 300                                                      | 89.60 $\pm$ 4.46a  | 88.60 $\pm$ 6.20b | 91.95 $\pm$ 3.54a | 88.45 $\pm$ 5.88b  |

Different letters represent the significant difference between different treatment groups ( $p < 0.05$ ).

Table S5. Effect of anthocyanins from PCA, PSP, PCO and GB on NO and TNF- $\alpha$  production in LPS-stimulated BV2 cells.

| Treatment group | Concentration levels | NO production ( $\mu\text{mol/L}$ ) | TNF- $\alpha$ production (ng/L) |
|-----------------|----------------------|-------------------------------------|---------------------------------|
| Blank control   |                      | 50.35 $\pm$ 3.64cD                  | 926.17 $\pm$ 24.89dC            |
| LPS             |                      | 69.95 $\pm$ 9.80aA                  | 1574.63 $\pm$ 15.30aA           |
|                 | 50                   | 58.47 $\pm$ 6.15bB                  | 1344.54 $\pm$ 64.39bB           |
| PCA             | 100                  | 57.45 $\pm$ 1.00bBC                 | 1304.72 $\pm$ 103.93bB          |
|                 | 200                  | 49.88 $\pm$ 2.97cD                  | 1126.48 $\pm$ 54.30cB           |
| PSP             | 50                   | 61.68 $\pm$ 8.09bB                  | 1291.30 $\pm$ 108.67bB          |

|     |     |              |                  |
|-----|-----|--------------|------------------|
|     | 100 | 52.86±5.53cC | 1116.76±52.47cC  |
|     | 200 | 49.77±3.39cD | 1101.48±26.45cB  |
|     | 50  | 63.48±6.44bB | 1341.30±37.11bB  |
| PCO | 100 | 62.38±4.09bB | 1301.02±40.38bB  |
|     | 200 | 61.13±2.00bB | 1255.19±155.77bB |
|     | 50  | 60.63±4.81bB | 1324.17±143.69bB |
| GB  | 100 | 59.14±2.25bB | 1292.69±28.14bcB |
|     | 200 | 55.75±2.80bC | 1182.96±127.25cB |

Different lowercase letters represent the significant difference in blank control, LPS and different concentrations under the same treatment group, and different capital letters represent the significant difference in blank control, LPS and different treatment groups under the same concentration ( $p < 0.05$ ).

Table S6. Effect of anthocyanins from PCA, PSP, PCO and GB on LPS-induced activation of TLR4 and MyD88 in BV2 cells.

| Treatment group | Concentration levels | TLR4/ $\beta$ -actin<br>(Relative levels) | MyD88/ $\beta$ -actin<br>(Relative levels) |
|-----------------|----------------------|-------------------------------------------|--------------------------------------------|
| Blank control   |                      | 0.159±0.009cD                             | 0.180±0.029cdD                             |
| LPS             |                      | 0.395±0.017aA                             | 0.446±0.027aA                              |
|                 | 50                   | 0.256±0.013bB                             | 0.398±0.023bB                              |
| PCA             | 100                  | 0.382±0.022aA                             | 0.188±0.012cD                              |
|                 | 200                  | 0.250±0.015bC                             | 0.200±0.025cD                              |
|                 | 50                   | 0.248±0.019cB                             | 0.403±0.039bB                              |
| PSP             | 100                  | 0.329±0.021bB                             | 0.237±0.031dC                              |
|                 | 200                  | 0.246±0.018cC                             | 0.290±0.028cC                              |
|                 | 50                   | 0.222±0.016cB                             | 0.305±0.026cC                              |
| PCO             | 100                  | 0.320±0.021bB                             | 0.360±0.031bB                              |
|                 | 200                  | 0.348±0.011bB                             | 0.181±0.011dD                              |
|                 | 50                   | 0.272±0.011cB                             | 0.378±0.031bB                              |
| GB              | 100                  | 0.323±0.019bB                             | 0.215±0.029dC                              |
|                 | 200                  | 0.387±0.018aA                             | 0.331±0.028cB                              |

Different lowercase letters represent the significant difference in blank control, LPS and different concentrations under the same treatment group, and different capital letters represent the significant difference in blank control, LPS and different treatment groups under the same concentration ( $p < 0.05$ ).

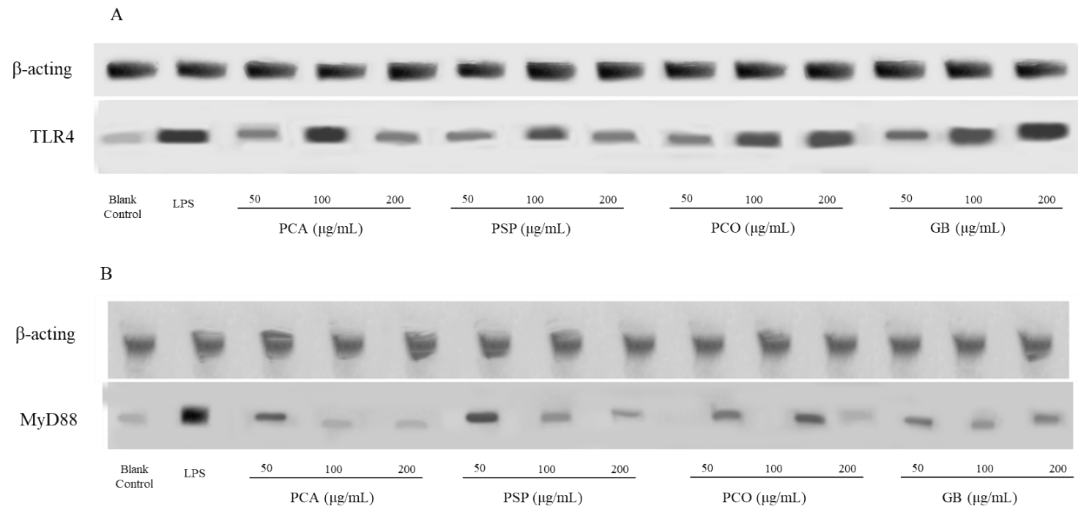

Fig. S1. Electrophoretic gels and blots of anthocyanins from PCA, PSP, PCO and GB on LPS-induced activation of TLR4 (A) and MyD88 (B) in BV2 cells.
